# Supplementary material for: Development and Validation of Optical Methods for Zeta Potential Determination of Silica and Polystyrene Particles in Aqueous Suspensions
Source: PubMed Central journal article supplement (PMC7827561; doi:10.3390/ma14020290), 2021-01-08
Supplement: materials-14-00290-s001.pdf [file materials-14-00290-s001.pdf]

# Development and Validation of Optical Methods for Zeta Potential Determination of Silica and Polystyrene Particles in Aqueous Suspensions

 Yannic Ramaye <sup>1</sup>, Marta Dabrio <sup>1</sup>, Gert Roebben <sup>1,2</sup> and Vikram Kestens <sup>1,\*</sup>
<sup>1</sup> European Commission, Joint Research Centre (JRC), 2440 Geel, Belgium;

yannic.ramaye@ec.europa.eu (Y.R.); marta.dabrio@ec.europa.eu (M.D.); gert.roebben@ec.europa.eu (G.R.)

<sup>2</sup> Present address: European Commission, Directorate-General for Internal Market, Industry, Entrepreneurship and SMEs, 1040 Brussels, Belgium

\* Correspondence: vikram.kestens@ec.europa.eu; Tel.: +32-1457-1614

## 1. Normal probability plots

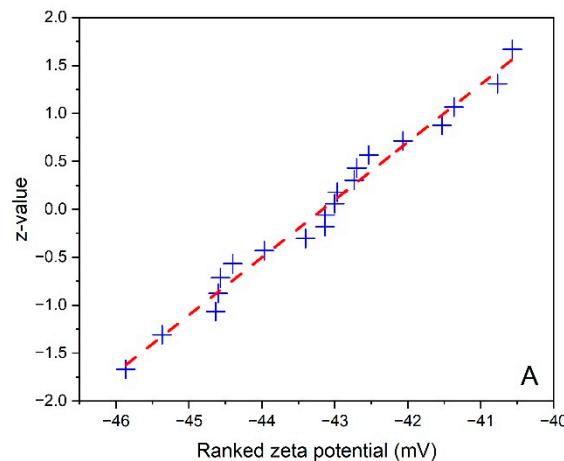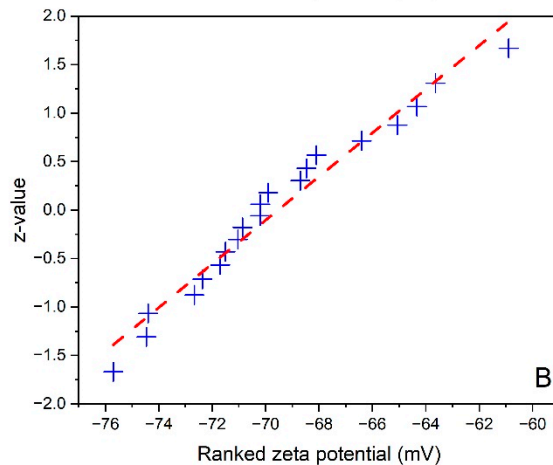

**Citation:** Ramaye, Y.; Dabrio, M.; Roebben, G.; Kestens, V. Development and Validation of Optical Methods for Zeta Potential Determination of Silica and Polystyrene Particles in Aqueous Suspensions. *Materials* **2021**, *14*, 290. <https://doi.org/10.3390/ma14020290>

Received: 4 December 2020

Accepted: 5 January 2021

Published: 8 January 2021

**Publisher's Note:** MDPI stays neutral with regard to jurisdictional claims in published maps and institutional affiliations.

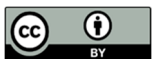

**Copyright:** © 2021 by the authors. Submitted for possible open access publication under the terms and conditions of the Creative Commons Attribution (CC BY) license (<http://creativecommons.org/licenses/by/4.0/>).

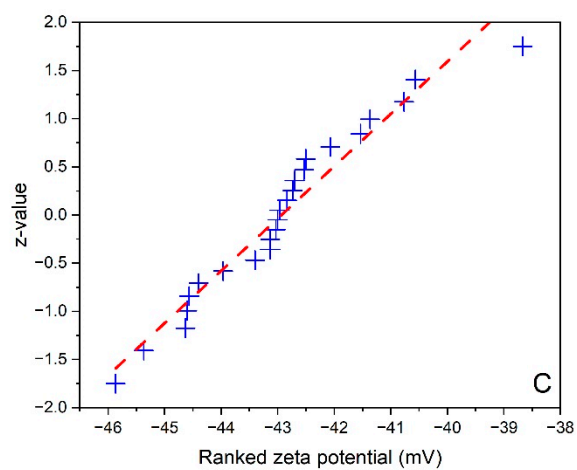

**Figure 1.** Normal probability plots for zeta potential obtained by ELS for (A) DTS 1235 and different cells, (B) PS-A and different cells and (C) DTS 1235 and different temperatures.
